# Supplementary material for: Exploration of differential methylation-driven genes to identify key epigenetic genes for prognosis of ovarian serous cystadenocarcinoma
Source: Research Square preprint supplement (doi:10.21203/rs.3.rs-121196/v1), 2020-12-21
Supplement: Supplementary file 1 [file 83662d7a252bbb5025e5b975.xlsx]

## Sheet: ORA_results
Pvalue	Qvalue	Pathway	Source	External_id	Members_input_overlap	Members_input_overlap_geneids	Size	Effective_size
8.99118e-06	0.00444164	Interleukin-18 signaling	Reactome	R-HSA-9012546	IL18; IL18BP; IL18RAP	10068; 3606; 8807	5	5
4.00062e-05	0.00988154	Cytokine Signaling in Immune system	Reactome	R-HSA-1280215	IL18; TNFSF12; IL18RAP; GBP2; IFI35; PIK3CD; CD40; TRIM22; OAS2; UBB; IL11RA; IRAK3; MYD88; IL18BP; SP100	10068; 6672; 8807; 10346; 5293; 3606; 3430; 4615; 958; 8742; 3590; 7314; 11213; 2634; 4939	458	458
0.000104144	0.017149	Interleukin-1 family signaling	Reactome	R-HSA-446652	IL18; IL18RAP; UBB; IRAK3; MYD88; IL18BP	10068; 8807; 4615; 11213; 7314; 3606	77	77
0.000929845	0.0756744	Taurine and Hypotaurine Metabolism	SMPDB	SMP00021	GGT6; CDO1	1036; 124975	5	5
0.0013128	0.0756744	Malaria - Homo sapiens (human)	KEGG	path:hsa05144	IL18; GYPC; MYD88; CD40	4615; 3606; 2995; 958	49	49
0.00139997	0.0756744	caspase cascade in apoptosis	BioCarta	caspasepathway	CASP10; SREBF1; ARHGDIB	397; 6720; 843	23	23
0.00158861	0.0756744	IL1 and megakaryocytes in obesity	Wikipathways	WP2865	IL18; SELENBP1; MYD88	4615; 3606; 8991	24	24
0.00249913	0.0756744	One Carbon Metabolism	Wikipathways	WP241	GLRX; AMT; TCN2	6948; 275; 2745	28	28
0.00261615	0.0756744	Complement and Coagulation Cascades	Wikipathways	WP558	C1S; PLAT; CFB; CFI	629; 3426; 716; 5327	59	59
0.00276775	0.0756744	Negative regulation of FGFR3 signaling	Reactome	R-HSA-5654732	FGF18; FGF2; UBB	2247; 7314; 8817	29	29
0.0027821	0.0756744	Dengue-2 Interactions with Complement and Coagulation Cascades	Wikipathways	WP3896	C1S; PLAT; CFB; CFI	629; 3426; 716; 5327	60	60
0.00305351	0.0756744	Beta2 integrin cell surface interactions	PID	integrin2_pathway	THY1; ICAM3; PLAT	5327; 7070; 3385	30	30
0.00326266	0.0756744	Beta-mercaptolactate-cysteine disulfiduria	SMPDB	SMP00499	CDO1; LDHAL6A	1036; 160287	9	9
0.00326266	0.0756744	Cysteine Metabolism	SMPDB	SMP00013	CDO1; LDHAL6A	1036; 160287	9	9
0.00326266	0.0756744	Cystinosis, ocular nonnephropathic	SMPDB	SMP00722	CDO1; LDHAL6A	1036; 160287	9	9
0.00326266	0.0756744	Synthesis of 5-eicosatetraenoic acids	Reactome	R-HSA-2142688	LTC4S; PON3	5446; 4056	9	9
0.00332297	0.0756744	Endochondral Ossification	Wikipathways	WP474	CDKN1C; FGF18; FGF2; PLAT	5327; 2247; 1028; 8817	63	63
0.00335675	0.0756744	Negative regulation of FGFR4 signaling	Reactome	R-HSA-5654733	FGF18; FGF2; UBB	2247; 7314; 8817	31	31
0.00346829	0.0756744	Signaling by Interleukins	Reactome	R-HSA-449147	IL18; IL18RAP; PIK3CD; UBB; IL11RA; IRAK3; MYD88; IL18BP	10068; 4615; 11213; 8807; 3590; 7314; 3606; 5293	254	254
0.00414987	0.0756744	FGF	INOH	None	SFN; FGF18; PIK3CD; FGF2	2247; 5293; 2810; 8817	67	67
0.00437459	0.0756744	Negative regulation of FGFR2 signaling	Reactome	R-HSA-5654727	FGF18; FGF2; UBB	2247; 7314; 8817	34	34
0.00485422	0.0756744	B cell receptor signaling pathway - Homo sapiens (human)	KEGG	path:hsa04662	DAPP1; NFATC3; PIK3CD; RAC3	4775; 5293; 27071; 5881	71	70
0.00492123	0.0756744	Taurine and hypotaurine metabolism - Homo sapiens (human)	KEGG	path:hsa00430	GGT6; CDO1	1036; 124975	11	11
0.00556078	0.0756744	Aldosterone-regulated sodium reabsorption - Homo sapiens (human)	KEGG	path:hsa04960	SFN; PIK3CD; SCNN1A	5293; 6337; 2810	37	37
0.00586785	0.0756744	Platelet-mediated interactions with vascular and circulating cells	Wikipathways	WP4462	CD40; CCL5	958; 6352	12	12
0.00586785	0.0756744	FGFR3 mutant receptor activation	Reactome	R-HSA-2033514	FGF18; FGF2	2247; 8817	12	12
0.00586785	0.0756744	Signaling by activated point mutants of FGFR3	Reactome	R-HSA-1839130	FGF18; FGF2	2247; 8817	12	12
0.00586785	0.0756744	Trihydroxycoprostanoyl-CoA beta-oxidation	EHMN	Trihydroxycoprostanoyl-CoA beta-oxidation	ACOX2; HADHB	8309; 3032	12	12
0.00689059	0.0756744	activation of pkc through g-protein coupled receptors	BioCarta	pkcpathway	AGT; PPP1R14A	183; 94274	13	13
0.00689059	0.0756744	FGFR3c ligand binding and activation	Reactome	R-HSA-190372	FGF18; FGF2	2247; 8817	13	13
0.00689059	0.0756744	FGFR3 ligand binding and activation	Reactome	R-HSA-190239	FGF18; FGF2	2247; 8817	13	13
0.00689059	0.0756744	Phospholipase C-mediated cascade; FGFR3	Reactome	R-HSA-5654227	FGF18; FGF2	2247; 8817	13	13
0.00689059	0.0756744	FGFR2c ligand binding and activation	Reactome	R-HSA-190375	FGF18; FGF2	2247; 8817	13	13
0.00689059	0.0756744	FGFRL1 modulation of FGFR1 signaling	Reactome	R-HSA-5658623	FGF18; FGF2	2247; 8817	13	13
0.00692234	0.0756744	Signaling by FGFR3	Reactome	R-HSA-5654741	FGF18; FGF2; UBB	2247; 7314; 8817	40	40
0.00741623	0.0756744	Signaling by FGFR4	Reactome	R-HSA-5654743	FGF18; FGF2; UBB	2247; 7314; 8817	41	41
0.0074382	0.0756744	Complement and coagulation cascades - Homo sapiens (human)	KEGG	path:hsa04610	C1S; PLAT; CFB; CFI	629; 3426; 716; 5327	79	79
0.00798788	0.0756744	FGFR4 ligand binding and activation	Reactome	R-HSA-190322	FGF18; FGF2	2247; 8817	14	14
0.0091582	0.0756744	Phospholipase C-mediated cascade; FGFR4	Reactome	R-HSA-5654228	FGF18; FGF2	2247; 8817	15	15
0.00959717	0.0756744	Integrin-linked kinase signaling	PID	ilk_pathway	LIMS2; PARVG; PPP1R14A	64098; 94274; 55679	45	45
