# Supplementary material for: Exploration of differential methylation-driven genes to identify key epigenetic genes for prognosis of ovarian serous cystadenocarcinoma
Source: Research Square preprint supplement (doi:10.21203/rs.3.rs-121196/v1), 2020-12-21
Supplement: Supplementary file 2 [file bcbf777ca7e2e230a4b736da.xlsx]

## Sheet: GO-BP
Term	Count	Percentage	PValue
GO:0006954 inflammatory response	12	7.01754	0.000934
GO:0045893 positive regulation of transcription, DNA-templated	13	7.60234	0.00350027
GO:0051092 positive regulation of NF-kappaB transcription factor activity	6	3.50877	0.00848194
GO:0045944 positive regulation of transcription from RNA polymerase II promoter	18	10.5263	0.0109933
GO:0007155 cell adhesion	11	6.43275	0.0116557
GO:0006883 cellular sodium ion homeostasis	3	1.75439	0.0135448
GO:0016337 single organismal cell-cell adhesion	5	2.92398	0.0152257
GO:0048661 positive regulation of smooth muscle cell proliferation	4	2.33918	0.0189155
GO:0009615 response to virus	5	2.92398	0.020187
GO:0060337 type I interferon signaling pathway	4	2.33918	0.0224152
GO:0006366 transcription from RNA polymerase II promoter	11	6.43275	0.0233898
GO:0055007 cardiac muscle cell differentiation	3	1.75439	0.0264744
GO:0072539 T-helper 17 cell differentiation	2	1.16959	0.0279646
GO:0060333 interferon-gamma-mediated signaling pathway	4	2.33918	0.0293301
GO:0071260 cellular response to mechanical stimulus	4	2.33918	0.0293301
GO:0031663 lipopolysaccharide-mediated signaling pathway	3	1.75439	0.0362897
GO:2000546 positive regulation of endothelial cell chemotaxis to fibroblast growth factor	2	1.16959	0.0371124
GO:0002755 MyD88-dependent toll-like receptor signaling pathway	3	1.75439	0.038397
GO:0000723 telomere maintenance	3	1.75439	0.0449888
GO:0006955 immune response	9	5.26316	0.0458288
GO:0006928 movement of cell or subcellular component	4	2.33918	0.0474862
GO:0030522 intracellular receptor signaling pathway	3	1.75439	0.0495978
GO:0032494 response to peptidoglycan	2	1.16959	0.055152
GO:0010535 positive regulation of activation of JAK2 kinase activity	2	1.16959	0.055152
GO:0009653 anatomical structure morphogenesis	4	2.33918	0.0559809
GO:0032024 positive regulation of insulin secretion	3	1.75439	0.0568136
GO:0007156 homophilic cell adhesion via plasma membrane adhesion molecules	5	2.92398	0.0622125
GO:0043123 positive regulation of I-kappaB kinase/NF-kappaB signaling	5	2.92398	0.0657889
GO:0007568 aging	5	2.92398	0.0705363
GO:0008630 intrinsic apoptotic signaling pathway in response to DNA damage	3	1.75439	0.072241
GO:0015992 proton transport	3	1.75439	0.0776525
GO:0036092 phosphatidylinositol-3-phosphate biosynthetic process	3	1.75439	0.0776525
GO:0006936 muscle contraction	4	2.33918	0.0800893
GO:0071356 cellular response to tumor necrosis factor	4	2.33918	0.0853739
GO:0042355 L-fucose catabolic process	2	1.16959	0.0902299
GO:0033762 response to glucagon	2	1.16959	0.0902299
GO:0007219 Notch signaling pathway	4	2.33918	0.0945013
GO:0097202 activation of cysteine-type endopeptidase activity	2	1.16959	0.0987953
GO:0045446 endothelial cell differentiation	2	1.16959	0.0987953
GO:0030431 sleep	2	1.16959	0.0987953

## Sheet: GO-CC
Term	Count	Percentage	PValue
GO:0070062 extracellular exosome	48	28.0702	1.32e-05
GO:0005615 extracellular space	26	15.2047	0.000468
GO:0016324 apical plasma membrane	8	4.67836	0.0169026
GO:0005576 extracellular region	24	14.0351	0.0191178
GO:0016323 basolateral plasma membrane	6	3.50877	0.0240824
GO:0005829 cytosol	41	23.9766	0.0304366
GO:0071944 cell periphery	3	1.75439	0.048531
GO:0014704 intercalated disc	3	1.75439	0.0626182
GO:0005737 cytoplasm	57	33.3333	0.0791415
GO:0031594 neuromuscular junction	3	1.75439	0.0886587
GO:0005887 integral component of plasma membrane	19	11.1111	0.0897483

## Sheet: GO-MF
Term	Count	Percentage	PValue
GO:0001077 transcriptional activator activity, RNA polymerase II core promoter proximal region sequence-specific binding	9	5.26316	0.001532
GO:0048306 calcium-dependent protein binding	4	2.33918	0.0162078
GO:0000978 RNA polymerase II core promoter proximal region sequence-specific DNA binding	9	5.26316	0.0168874
GO:0005509 calcium ion binding	13	7.60234	0.0327483
GO:0016303 1-phosphatidylinositol-3-kinase activity	3	1.75439	0.0592134
GO:0008083 growth factor activity	5	2.92398	0.0622951
GO:0042379 chemokine receptor binding	2	1.16959	0.0711519
GO:0005198 structural molecule activity	6	3.50877	0.0776738
GO:0003713 transcription coactivator activity	6	3.50877	0.078715
GO:0005125 cytokine activity	5	2.92398	0.0791381
GO:0042802 identical protein binding	12	7.01754	0.0843107
GO:0004252 serine-type endopeptidase activity	6	3.50877	0.0862133
GO:0017081 chloride channel regulator activity	2	1.16959	0.0881393
GO:0003707 steroid hormone receptor activity	3	1.75439	0.093589
